# Supplementary material
Source: publisher figshare collection journal article supplement (https://acs.figshare.com/ndownloader/files/4847680)
Supplement: Supplementary file 1 [file 4847680]

**Supplementary Information for**

**Origin of Photocarrier Losses in Iron Pyrite (FeS<sub>2</sub>) Nanocubes**

*Sudhanshu Shukla<sup>1, 2</sup>, Guichuan Xing<sup>3</sup>, Hu Ge<sup>2</sup>, Rajiv Ramanujam Prabhakar<sup>4</sup>, Sinu Mathew<sup>5</sup>,  
Zhenghua Su<sup>4</sup>, Venkatram Nalla<sup>6</sup>, Thirumalai Venkatesan<sup>5</sup>, Nripan Mathews<sup>2</sup>, Thirumany  
Sritharan<sup>2</sup>, Tze Chien Sum<sup>3</sup> and Qihua Xiong,<sup>3, 7</sup>*

<sup>1</sup>Energy Research Institute, Interdisciplinary Graduate School, <sup>2</sup>School of Materials Science and Engineering, Nanyang Technological University, Singapore, <sup>3</sup>Division of Physics and Applied Physics, School of Physical and Mathematical Sciences, Nanyang Technological University, Singapore, <sup>4</sup>Energy Research Institute, Nanyang Technological University, Singapore  
<sup>5</sup>Department of Electrical and Computer Engineering, National University of Singapore, Singapore 117576, NUSNNI-NanoCore, National University of Singapore, Singapore 117576,  
<sup>6</sup>Centre for Disruptive Photonic Technologies (CDPT), Nanyang Technological University, Singapore 639798 and <sup>7</sup>NOVITAS, Nanoelectronics Centre of Excellence, School of Electrical and Electronic Engineering, Nanyang Technological University, Singapore

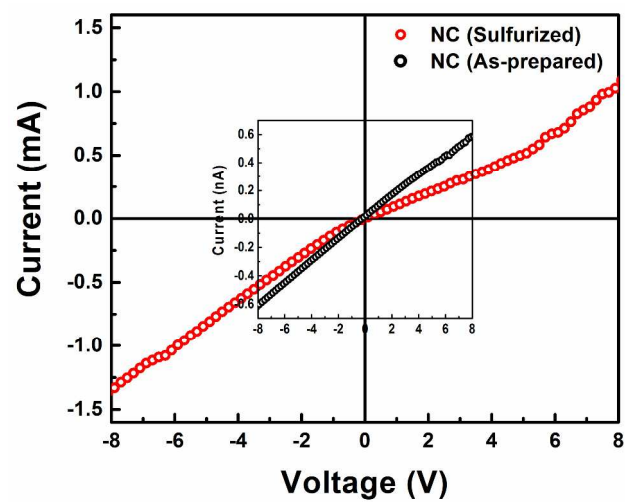

**Figure S1** Current voltage characteristics of as-prepared (central) and sulfurized iron pyrite nanocube thin films

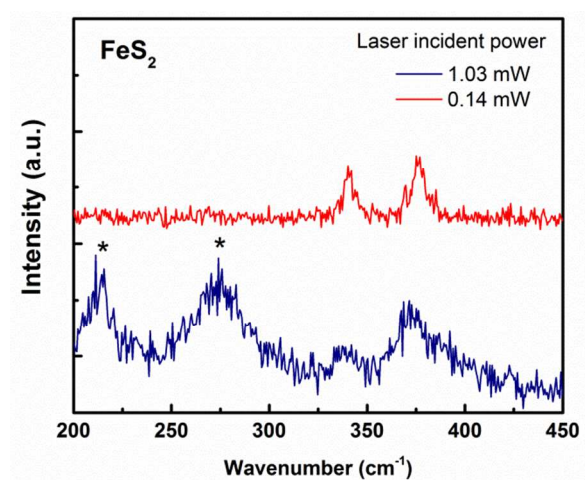

**Figure S2** Raman spectra of iron pyrite nanocubes using excitation wavelength of 532 nm, 1.03 mW incident power results in extra peaks (asterisk) due to laser induced oxidation.

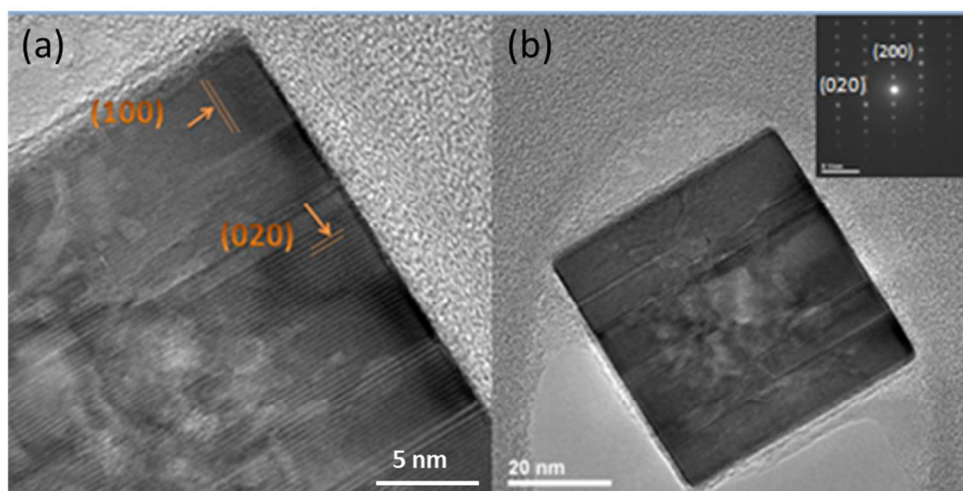

**Figure S3** (a) HRTEM image of the edge of as-prepared iron pyrite nanocube, (b) single nanocube, inset shows the FFT pattern of the corresponding lattice fringes

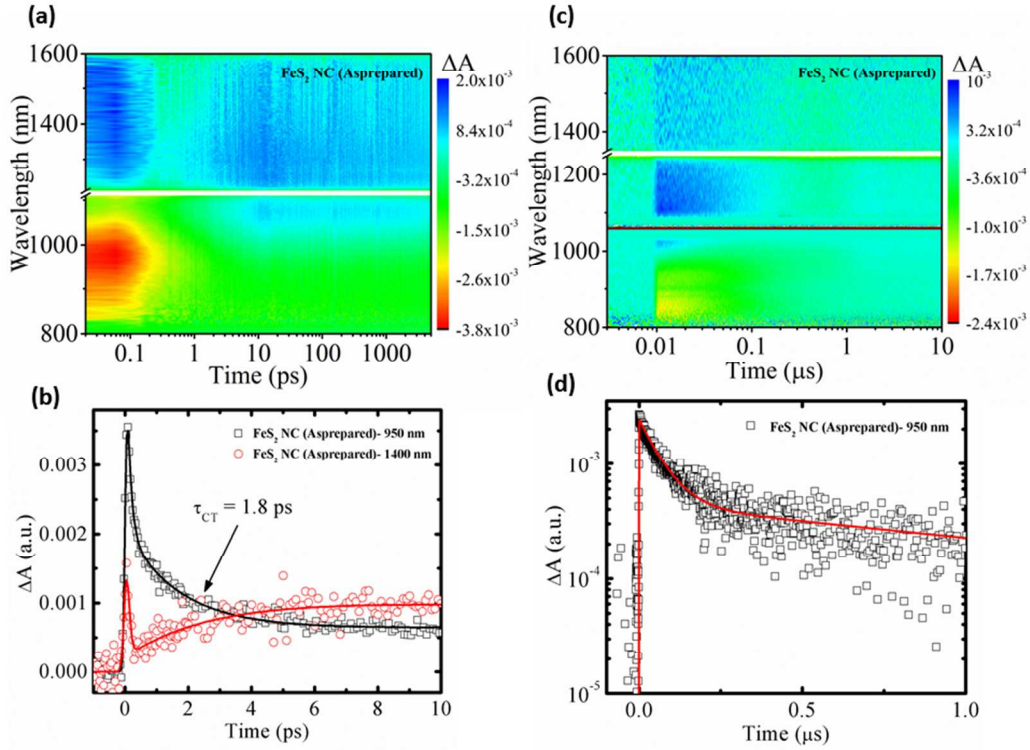

**Figure S4** Differential transient absorption spectra after photoexcitation of as-prepared iron pyrite nanocubes as a function of time delay in (a) femto-pico second range, (c) nano-micro second range. Carrier decay dynamics probed at 950 nm (photobleaching) and 1400 nm (photoinduced absorption) by fitting the transients in (b) picosecond range, fitted with single exponential decay function (solid black line) with decay time constant (charge transfer time,  $\tau_{ct}$ ) 1.8 ps and (d) microsecond range, fitted with biexponential decay function with time constants 50 ns ( $\tau_{d1}$ ) and 990 ns ( $\tau_{d2}$ ) associated with long live trap states and eventual recombination process

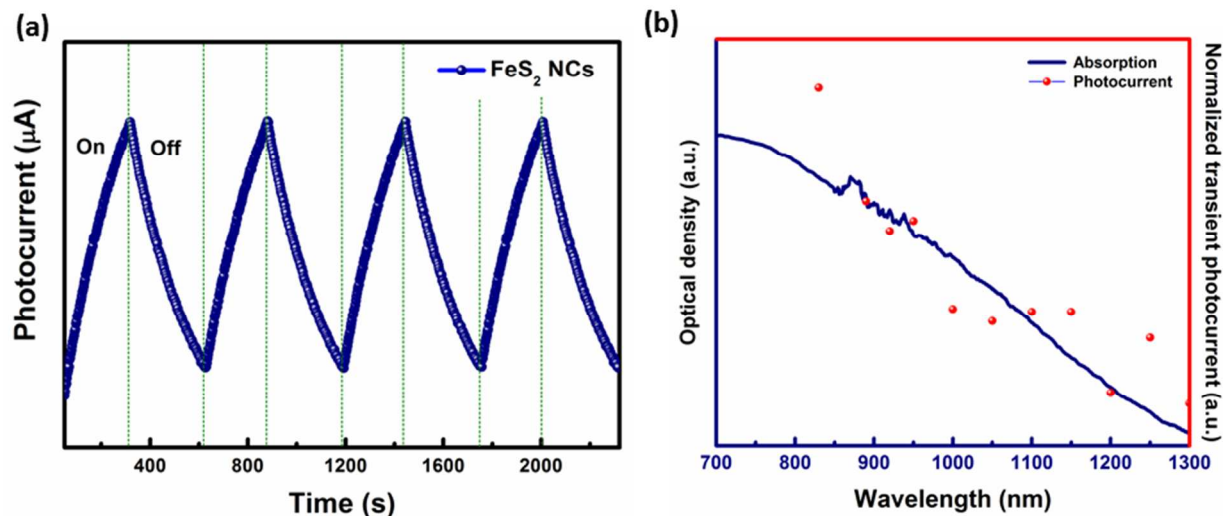

**Figure S5** (a) Time dependent photoresponse of iron pyrite nanocubes under broadband white light illumination, measured in a two electrode configuration. (b) Photocurrent measured from femtosecond transient photocurrent spectroscopy (on right) and absorption spectra (on left) of pyrite.

**Table ST1.** Raw data of the Hall measurement

| Probes Source meter | 13 24                  | 24 31                  | 13 24                  | 24 31                  |
|---------------------|------------------------|------------------------|------------------------|------------------------|
| Current 1 (A)       | $1.24 \times 10^{-5}$  | $1.24 \times 10^{-5}$  | $1.24 \times 10^{-5}$  | $1.24 \times 10^{-5}$  |
| Voltage 1 (V)       | -0.10                  | 0.10                   | -0.10                  | 0.10                   |
| Current 2 (A)       | $-1.24 \times 10^{-5}$ | $-1.24 \times 10^{-5}$ | $-1.24 \times 10^{-5}$ | $-1.24 \times 10^{-5}$ |
| Voltage 2 (V)       | 0.105                  | -0.106                 | 0.106                  | -0.106                 |
| Resistance (Ohm)    | -8485.8                | 8581.0                 | -8554.4                | 8647.2                 |
| Field (G)           | 5016                   |                        | -5025                  |                        |

|                                                  |                       |
|--------------------------------------------------|-----------------------|
| Temperature(K)                                   | 302.0                 |
| Resistivity ( $\Omega \cdot \text{cm}$ )         | 11.20                 |
| Mobility ( $\text{cm}^2/\text{V}\cdot\text{s}$ ) | 0.10                  |
| Density ( $\text{cm}^{-3}$ )                     | $5.30 \times 10^{18}$ |
| Hall Coefficient ( $\text{cm}^3/\text{coul}$ )   | 1.17                  |
| Type of carriers                                 | holes                 |
